# Supplementary material for: Isolation of Polysaccharides from Trichoderma harzianum with Antioxidant, Anticancer, and Enzyme Inhibition Properties
Source: MDPI journal article supplement (doi:10.3390/antiox10091372), 2021-08-28
Supplement: s1 [file s1]

## Materials

*Trichoderma harzianum* was previously isolated from the wetland soil by our group [1]. Trifluoroacetic acid (TFA) (Daejung Chemicals & Metals, Korea), DEAE Sepharose Fast Flow (GE Healthcare Life Science, Sweden), 1-phenyl-3-methyl-5-pyrazolone (PMP) (Tokyo Chemical Industry, Japan), Monosaccharides standard kit, 2,2'-Azino-bis (3-ethylbenzothiazoline-6-sulfonic acid) diammonium salt (ABTS) and 1,2-diphenyl-1-picrylhydrazyl (DPPH) were obtained from Sigma-Aldrich, USA. The noncancerous mice fibroblast (NIH3T3) cell line and cancerous human breast cancer (MDA-MB231) cell line were procured from the Korean Cell Line Bank (KCLB, Seoul, Republic of Korea) and all the other mammalian cell line stains, washing buffer solution and culture medium were obtained from Thermo Fishers Scientific Seoul, Republic of Korea.



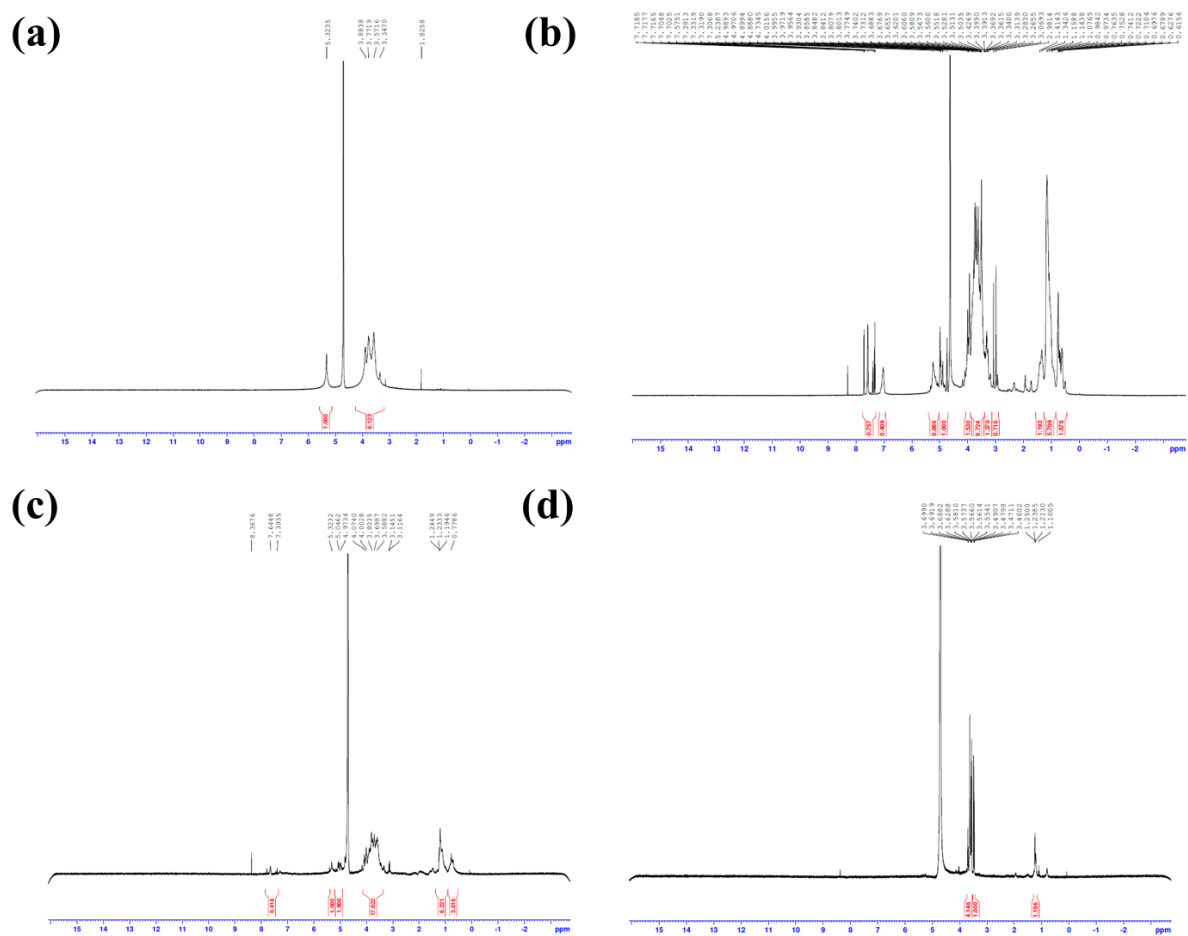

SI.Fig.3. Structural characterization of IPS (1-4) by NMR spectral analysis. <sup>1</sup>H NMR spectrum of IPS1 (a), IPS2(b), IPS3 (c) and IPS4 (d).

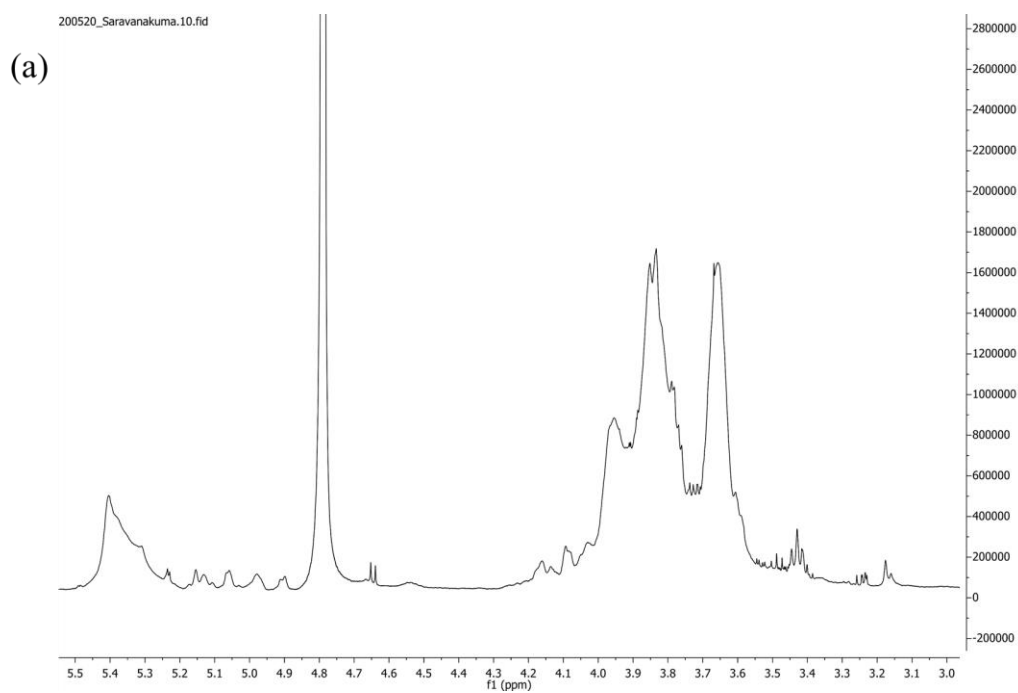

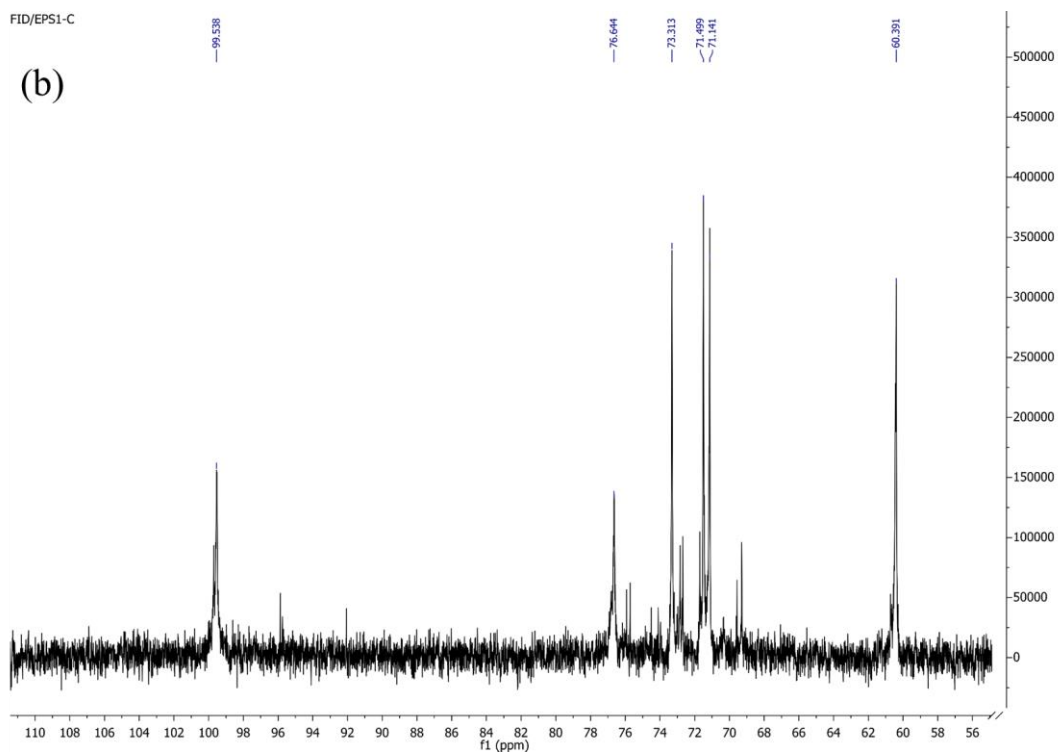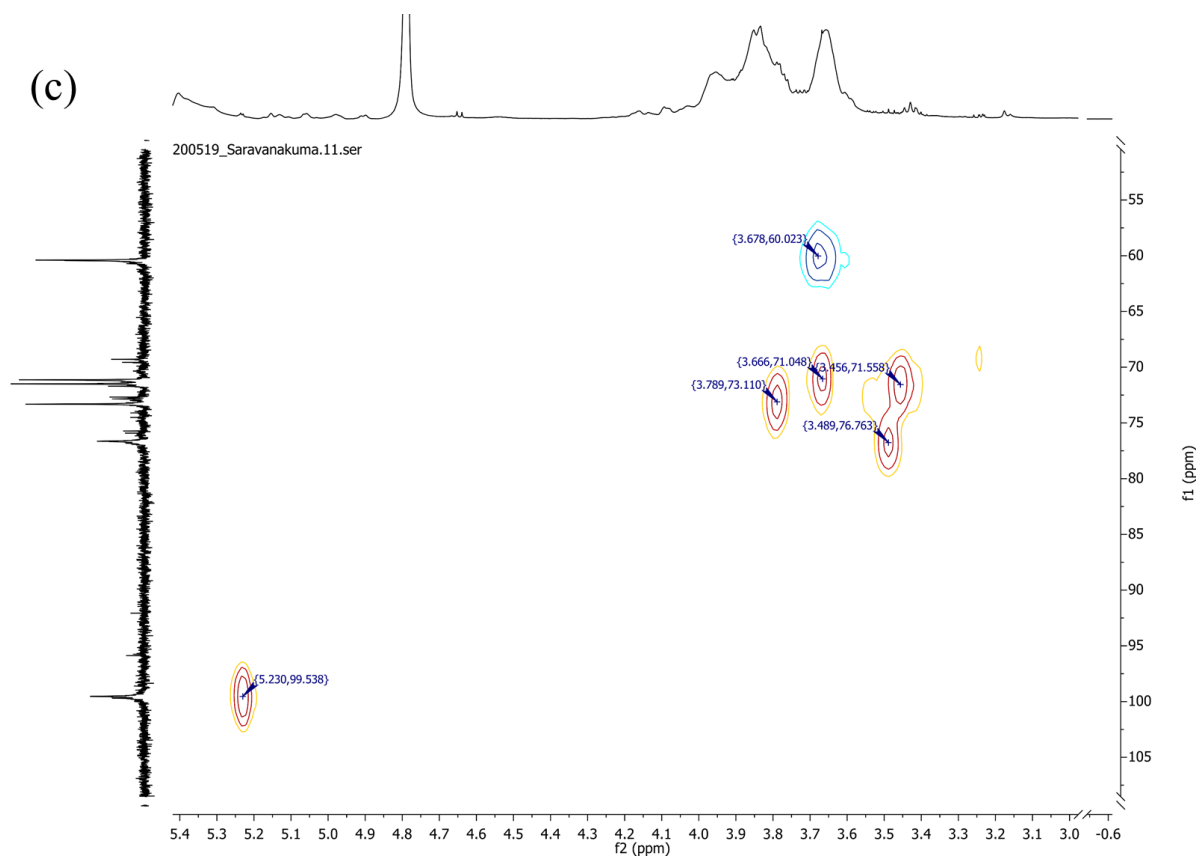

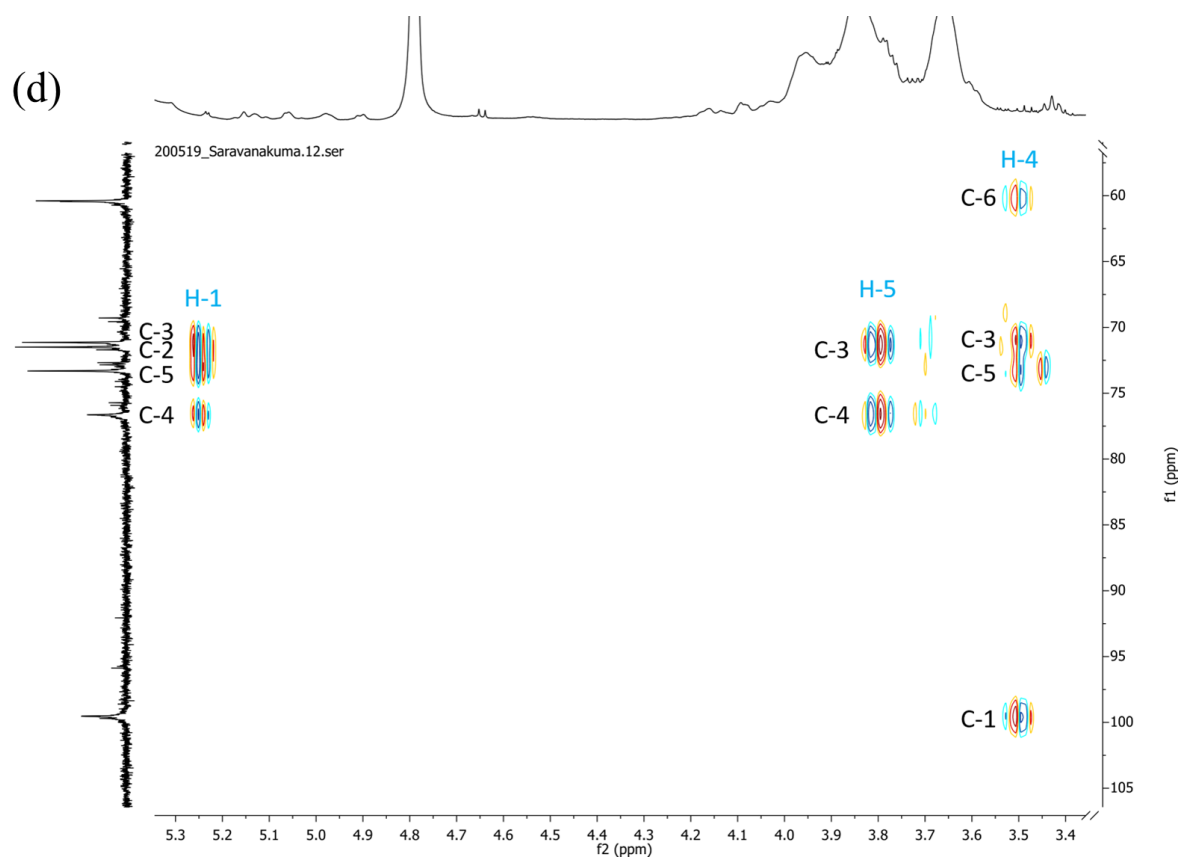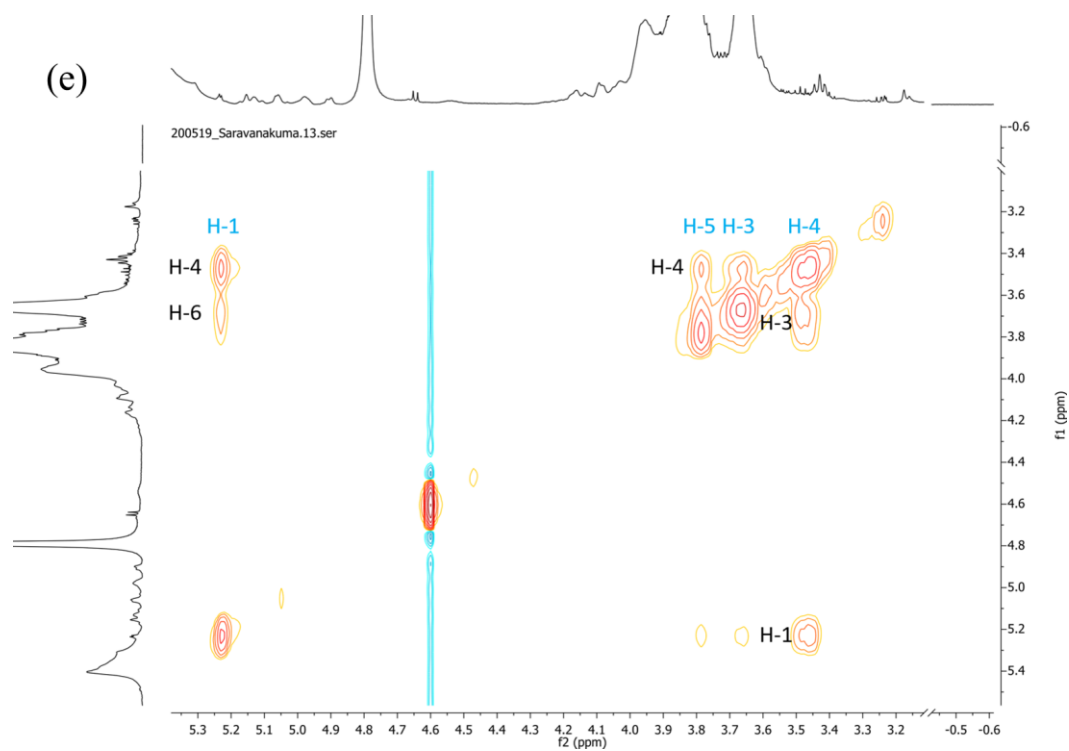

SI.Fig.4. Structural characterization of EPS1 by NMR spectral analysis.  $^1\text{H}$  NMR spectrum (a),  $^{13}\text{C}$  NMR spectrum (b), HSQC spectrum (c), HMBC spectrum (d), and NOESY NMR spectrum (e).

## **Reference**

[1] K. Saravanakumar, M.-H. Wang, Isolation and molecular identification of *Trichoderma* species from wetland soil and their antagonistic activity against phytopathogens, *Physiological and Molecular Plant Pathology* 109 (2020) 101458.
